# Supplementary material
Source: PubMed Central journal article supplement (PMC8867390)
Supplement: jamacardiol-e216016-s001.pdf [file jamacardiol-e216016-s001.pdf]

## Supplementary Online Content

Gasperetti A, Cappelletto C, Carrick R, et al. Association of premature ventricular contraction burden on serial Holter monitoring with arrhythmic risk in patients with arrhythmogenic right ventricular cardiomyopathy. *JAMA Cardiol*. Published online February 23, 2022. doi:10.1001/jamacardio.2021.6016

### **eMethods.** Final Model Performance

**eTable 1.** Characteristics at Disease Diagnosis by Presence of PVC Spikes

**eTable 2.** Characteristics at Disease Diagnosis by Presence of Ventricular Arrhythmia Events During Follow-up

**eTable 3.** Association of PVC on Holter Finding With Occurrence of a Sustained Ventricular Arrhythmia Event

**eTable 4.** Association of PVC Spike on Holter Finding With Occurrence of a Sustained Ventricular Arrhythmia Event

**eTable 5.** Association of NSVT on Holter Finding With Occurrence of a Sustained Ventricular Arrhythmia Event

**eTable 6.** Association of Use of  $\beta$ -Blockers During Holter Examination With Occurrence of a Sustained Ventricular Arrhythmia Event

**eTable 7.** Association of Use of Class III AADs During Holter Examination With Occurrence of a Sustained Ventricular Arrhythmia Event

**eTable 8.** Association of Male Sex at Holter Examination With Occurrence of a Sustained Ventricular Arrhythmia Event

**eTable 9.** Results of Final Model

**eTable 10.** Final Model in Primary Prevention Patients With ARVC (n = 122)

**eTable 11.** Final Model in Secondary Prevention Patients With ARVC (n = 47)

**eTable 12.** Final Model Performance in Patients With ARVC and No ICD at Baseline (n = 96)

**eTable 13.** Final Model Performance in Patients With ARVC Implanted With ICD at Baseline (n = 73)

**eFigure 1.** PVC Burden Modification During Follow-up Stratifying Patients by  $\beta$ -Blocker Therapy

**eFigure 2.** Calibration Plots for Final Model

This supplementary material has been provided by the authors to give readers additional information about their work.

## eMethods. Final Model Performance

The following tables reports the final model performance if the following definition of a PVC spike is used:

- a) an absolute increase in PVC burden  $\geq 5000$  PVCs and/or
- b) a relative % increase  $\geq 50\%$  from the preceding Holter, with an absolute increase of at least 1000 PVCs.

| Holter predictors of an SVA event in the upcoming 12 months |          |                |                  |
|-------------------------------------------------------------|----------|----------------|------------------|
| Fixed Effects                                               |          |                |                  |
|                                                             | OR       | C.I.           | p                |
| 24-h PVC burden (log)                                       | 1.532    | [1.128–2.082]  | <b>0.006</b>     |
| Presence of a PVC Spike                                     | 5.343    | [2.387–11.962] | <b>&lt;0.001</b> |
| Presence of nsVT                                            | 2.223    | [1.103–4.479]  | <b>0.025</b>     |
| Random Effects                                              |          |                |                  |
|                                                             | Estimate | Standard Error | C.I.             |
| Patient                                                     | 0.889    | 0.343          | [0.418–1.893]    |

C-statistic: 0.889 [0.850–0.927]

The following tables reports the final model performance if the following definition of a PVC spike is used:

- a) an absolute increase in PVC burden  $\geq 5000$  PVCs and/or
- b) a relative % increase  $\geq 100\%$  from the preceding Holter, with an absolute increase of at least 1000 PVCs.

| Holter predictors of an SVA event in the upcoming 12 months |          |                |                  |
|-------------------------------------------------------------|----------|----------------|------------------|
| Fixed Effects                                               |          |                |                  |
|                                                             | OR       | C.I.           | p                |
| 24-h PVC burden (log)                                       | 1.557    | [1.151–2.106]  | <b>0.004</b>     |
| Presence of a PVC Spike                                     | 5.189    | [2.352–11.447] | <b>&lt;0.001</b> |
| Presence of nsVT                                            | 2.213    | [1.108–4.422]  | <b>0.024</b>     |
| Random Effects                                              |          |                |                  |
|                                                             | Estimate | Standard Error | C.I.             |
| Patient                                                     | 0.837    | 0.342          | [0.376–1.864]    |

Harrel's C: 0.880 [0.840–0.920]

**eTable 1. Characteristics at Disease Diagnosis by Presence of PVC Spikes**

|                                             | ARVC patients with PVC spikes (n = 67) | ARVC patients without PVC spikes (n = 102) | p            |
|---------------------------------------------|----------------------------------------|--------------------------------------------|--------------|
| Age (years), mean±s.d.                      | 37.5±14.9                              | 35.5±15.0                                  | 0.381        |
| Male sex, n (%)                             | 37 (55.2)                              | 58 (56.9)                                  | 0.834        |
| Proband Status, n (%)                       | 54 (80.6)                              | 74 (72.6)                                  | 0.233        |
| Pathogenic/Likely Pathogenic Variant, n (%) | 33 (49.2)                              | 52 (51.0)                                  | 0.826        |
| Recent cardiac syncope, n (%)               | 13 (19.4)                              | 11 (10.8)                                  | 0.116        |
| TWI, median [IQR]                           | 3 [2–4]                                | 3 [2–4]                                    | 0.755        |
| nsVT at diagnosis, n (%)                    | 29 (43.9)                              | 32 (32.0)                                  | 0.118        |
| 24-h PVC count, median [IQR]                | 3851 [1241–9979]                       | 1553 [366–7000]                            | <b>0.011</b> |
| History of SVT at diagnosis, n (%)          | 19 (28.4)                              | 28 (27.5)                                  | 0.898        |
| RVEF at CMR (%), mean±s.d.                  | 44.9±12.7                              | 46.8±11.8                                  | 0.338        |

**eTable 2. Characteristics at Disease Diagnosis by Presence of Ventricular Arrhythmia Events During Follow-up**

| Characteristics at Disease Diagnosis |                                       |                                          |                  |
|--------------------------------------|---------------------------------------|------------------------------------------|------------------|
|                                      | ARVC patients with VA events (n = 57) | ARVC patients without VA event (n = 112) | p                |
| Age (years), mean±s.d.               | 34.0±14.4                             | 37.4±15.1                                | 0.166            |
| Male sex, n (%)                      | 35 (51.4)                             | 60 (53.6)                                | 0.332            |
| Proband Status, n (%)                | 49 (85.9)                             | 79 (70.5)                                | <b>0.027</b>     |
| Recent cardiac syncope, n (%)        | 11 (9.8)                              | 13 (22.8)                                | <b>0.022</b>     |
| TWI, median [IQR]                    | 4 [3 – 5]                             | 3 [2 – 4]                                | <b>0.002</b>     |
| nsVT at diagnosis, n (%)             | 27 (48.2)                             | 34 (30.9)                                | <b>0.029</b>     |
| 24-h PVC count, median [IQR]         | 5000 [2240 – 8000]                    | 1437 [333 – 6047]                        | <b>&lt;0.001</b> |
| History of SVT at diagnosis, n (%)   | 20 (35.1)                             | 27 (24.1)                                | 0.132            |
| RVEF at CMR (%), mean±s.d.           | 43.7±10.2                             | 47.2±12.9                                | 0.102            |
| LVEF at CMR (%), mean±s.d.           | 53.4±8.1                              | 55.1±8.2                                 | 0.247            |

**eTable 3. Association of PVC on Holter Finding With Occurrence of a Sustained Ventricular Arrhythmia Event**

| Per Holter Event Predictor |          |                |                  |
|----------------------------|----------|----------------|------------------|
| Fixed Effects              |          |                |                  |
|                            | OR       | C.I.           | p                |
| PVC at Holter (log)        | 2.189    | [1.636–2.929]  | <b>&lt;0.001</b> |
| Random Effects             |          |                |                  |
|                            | Estimate | Standard Error | C.I.             |
| Patient                    | 0.760    | 0.343          | [0.313–1.842]    |

**eTable 4. Association of PVC Spike on Holter Finding With Occurrence of a Sustained Ventricular Arrhythmia Event**

| Per Holter Event Predictor |          |                |                  |
|----------------------------|----------|----------------|------------------|
| Fixed Effects              |          |                |                  |
|                            | OR       | C.I.           | p                |
| PVC Spike                  | 13.071   | [6.036–28.307] | <b>&lt;0.001</b> |
| Random Effects             |          |                |                  |
|                            | Estimate | Standard Error | C.I.             |
| Patient                    | 0.890    | 0.350          | [0.413–1.919]    |

**eTable 5. Association of NSVT on Holter Finding With Occurrence of a Sustained Ventricular Arrhythmia Event**

| Per Holter Event Predictor |          |                |                  |
|----------------------------|----------|----------------|------------------|
| Fixed Effects              |          |                |                  |
|                            | OR       | C.I.           | p                |
| NSVT                       | 4.110    | [2.333–7.240]  | <b>&lt;0.001</b> |
| Random Effects             |          |                |                  |
|                            | Estimate | Standard Error | C.I.             |
| Patient                    | 0.441    | 0.420          | [0.068–2.852]    |

**eTable 6. Association of Use of  $\beta$ -Blockers During Holter Examination With Occurrence of a Sustained Ventricular Arrhythmia Event**

| Per Holter Event Predictor |          |                |               |
|----------------------------|----------|----------------|---------------|
| Fixed Effects              |          |                |               |
|                            | OR       | C.I.           | p             |
| Use of BB-blockers         | 1.010    | [0.574–1.773]  | 0.973         |
| Random Effects             |          |                |               |
|                            | Estimate | Standard Error | C.I.          |
| Patient                    | 0.570    | 0.358          | [0.166–1.952] |

**eTable 7. Association of Use of Class III AADs During Holter Examination With Occurrence of a Sustained Ventricular Arrhythmia Event**

| Per Holter Event Predictor |          |                |               |
|----------------------------|----------|----------------|---------------|
| Fixed Effects              |          |                |               |
|                            | OR       | C.I.           | p             |
| Use of ClassIII AADs       | 1.191    | [0.630–2.253]  | 0.590         |
| Random Effects             |          |                |               |
|                            | Estimate | Standard Error | C.I.          |
| Patient                    | 0.554    | 0.365          | [0.153–2.012] |

**eTable 8. Association of Male Sex at Holter Examination With Occurrence of a Sustained Ventricular Arrhythmia Event**

| Per Holter Event Predictor |          |                |               |
|----------------------------|----------|----------------|---------------|
| Fixed Effects              |          |                |               |
|                            | OR       | C.I.           | p             |
| Male sex                   | 1.042    | [0.585–1.856]  | 0.888         |
| Random Effects             |          |                |               |
|                            | Estimate | Standard Error | C.I.          |
| Patient                    | 0.574    | 0.357          | [0.169–1.942] |

**eTable 9. Results of Final Model**

| Holter predictors of an SVA event in the upcoming 12 months |          |                |                  |
|-------------------------------------------------------------|----------|----------------|------------------|
| Fixed Effects                                               |          |                |                  |
|                                                             | OR       | C.I.           | p                |
| 24-h PVC burden (log)                                       | 1.498    | [1.104–2.034]  | <b>0.010</b>     |
| Presence of a PVC spike                                     | 6.196    | [2.743–13.993] | <b>&lt;0.001</b> |
| Presence of NSVT                                            | 2.289    | [1.100–4.514]  | <b>0.026</b>     |
| Random Effects                                              |          |                |                  |
|                                                             | Estimate | Standard Error | C.I.             |
| Patient                                                     | 0.882    | 0.347          | [0.408–1.907]    |

**eTable 10. Final Model in Primary Prevention Patients With ARVC (n = 122)**

| Holter predictors of an SVA event in the upcoming 12 months |          |                |                  |
|-------------------------------------------------------------|----------|----------------|------------------|
| Fixed Effects                                               |          |                |                  |
|                                                             | OR       | C.I.           | p                |
| 24-h PVC burden (log)                                       | 1.388    | [0.955–2.017]  | 0.086            |
| Presence of a PVC Spike                                     | 8.276    | [2.663–25.715] | <b>&lt;0.001</b> |
| Presence of nsVT                                            | 2.297    | [0.907–5.818]  | 0.080            |
| Random Effects                                              |          |                |                  |
|                                                             | Estimate | Standard Error | C.I.             |
| Patient                                                     | 0.893    | 0.499          | [0.299–2.669]    |

**eTable 11. Final Model in Secondary Prevention Patients With ARVC (n = 47)**

| Holter predictors of an SVA event in the upcoming 12 months |          |                |               |
|-------------------------------------------------------------|----------|----------------|---------------|
| Fixed Effects                                               |          |                |               |
|                                                             | OR       | C.I.           | p             |
| 24-h PVC burden (log)                                       | 1.673    | [0.986–2.839]  | 0.056         |
| Presence of a PVC Spike                                     | 4.150    | [1.159–14.863] | <b>0.029</b>  |
| Presence of nsVT                                            | 2.171    | [0.712–6.621]  | 0.173         |
| Random Effects                                              |          |                |               |
|                                                             | Estimate | Standard Error | C.I.          |
| Patient                                                     | 0.884    | 0.507          | [0.287–2.718] |



**eTable 12. Final Model Performance in Patients With ARVC and No ICD at Baseline (n = 96)**

| Holter predictors of an SVA event in the upcoming 12 months |          |                |               |
|-------------------------------------------------------------|----------|----------------|---------------|
| Fixed Effects                                               |          |                |               |
|                                                             | OR       | C.I.           | p             |
| 24-h PVC burden (log)                                       | 1.504    | [0.954–2.375]  | 0.079         |
| Presence of a PVC Spike                                     | 7.835    | [2.127–28.858] | <b>0.002</b>  |
| Presence of nsVT                                            | 2.191    | [0.692–6.940]  | 0.182         |
| Random Effects                                              |          |                |               |
|                                                             | Estimate | Standard Error | C.I.          |
| Patient                                                     | 0.689    | 0.436          | [0.081–5.834] |

**eTable 13. Final Model Performance in Patients With ARVC Implanted With ICD at Baseline (n = 73)**

| Holter predictors of an SVA event in the upcoming 12 months |          |                |                  |
|-------------------------------------------------------------|----------|----------------|------------------|
| Fixed Effects                                               |          |                |                  |
|                                                             | OR       | C.I.           | p                |
| 24-h PVC burden (log)                                       | 1.600    | [1.033–2.479]  | <b>0.035</b>     |
| Presence of a PVC Spike                                     | 4.472    | [1.527–13.099] | <b>&lt;0.001</b> |
| Presence of nsVT                                            | 2.056    | [0.835–5.059]  | 0.117            |
| Random Effects                                              |          |                |                  |
|                                                             | Estimate | Standard Error | C.I.             |
| Patient                                                     | 0.806    | 0.436          | [0.279–2.326]    |

**eFigure 1.** PVC Burden Modification During Follow-up Stratifying Patients by  $\beta$ -Blocker Therapy

No significant difference in the trend of reduction of the PVC burden was observed between patients on and off beta-blocker therapy.

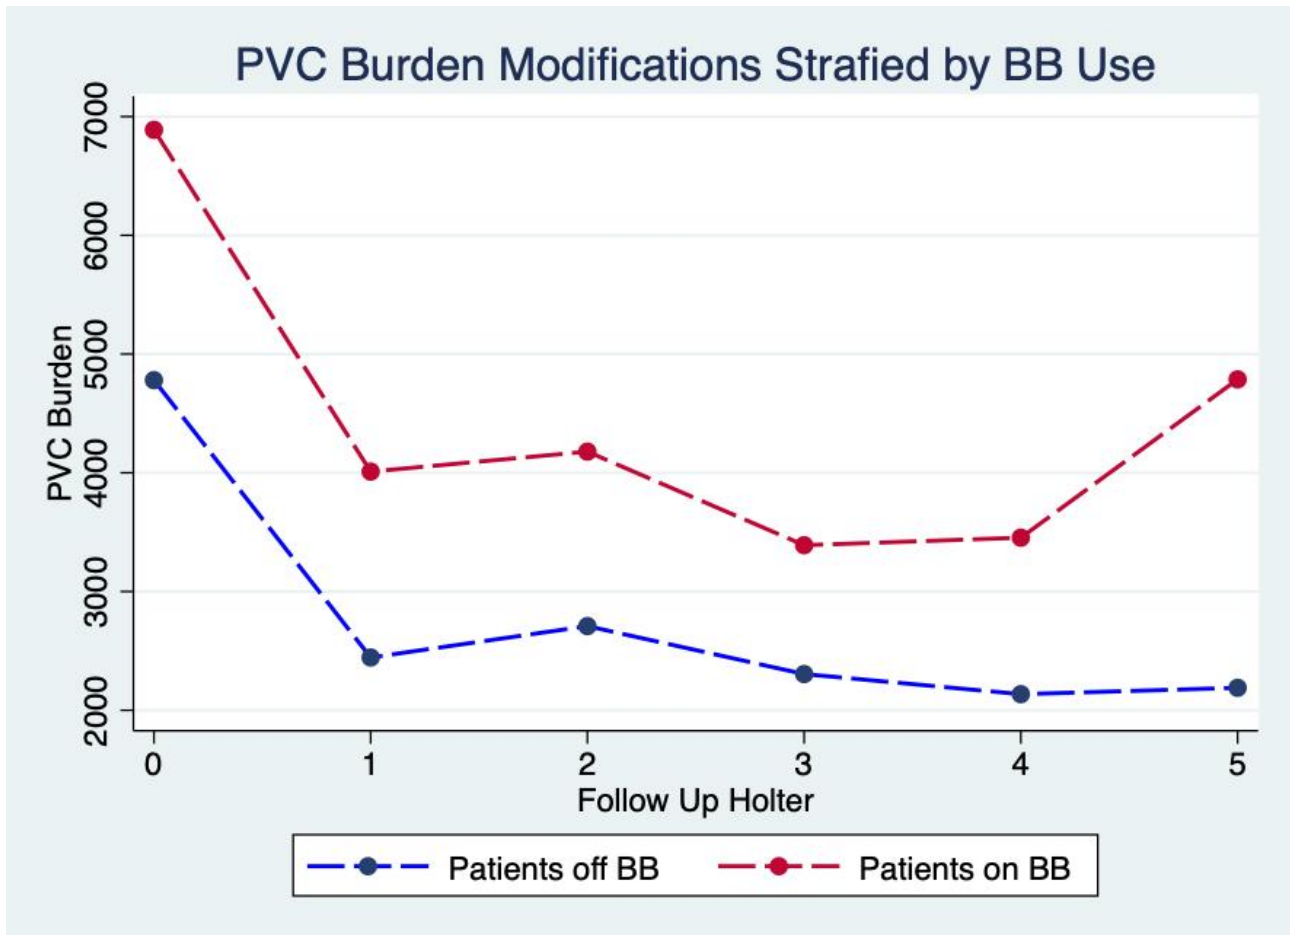

**eFigure 2.** Calibration Plots for Final Model

- A) Final model, using the PVC spike definition from the main manuscript;
- B) Final model, using a PVC spike definition with 50% increase as % increase threshold;
- C) Final model, using a PVC spike definition with 100% increase as % increase threshold;

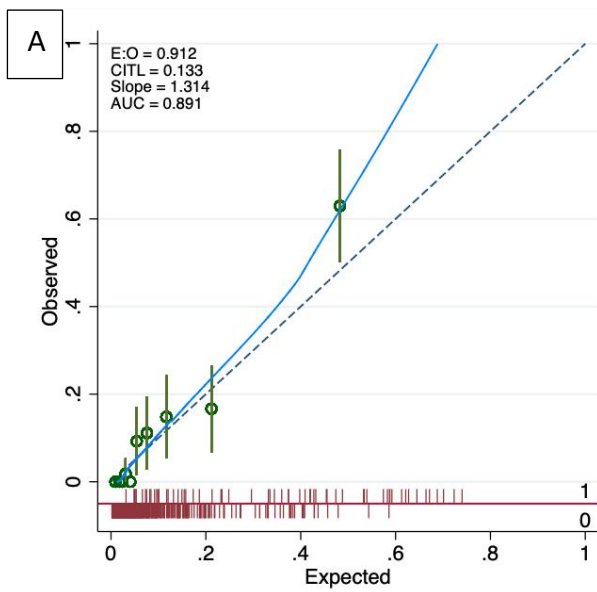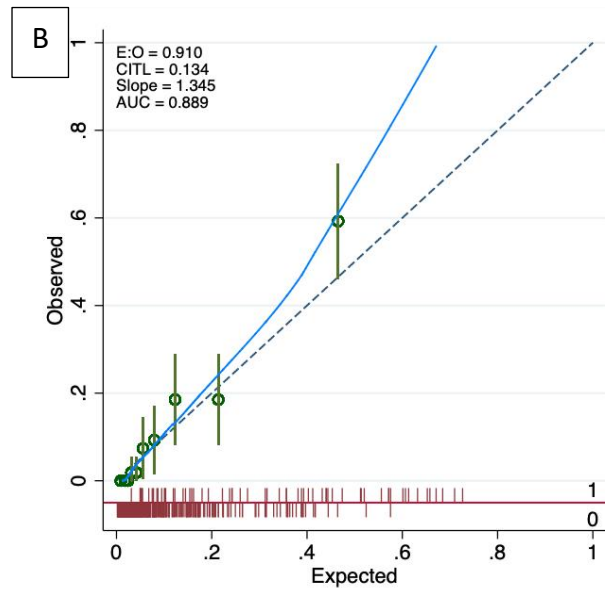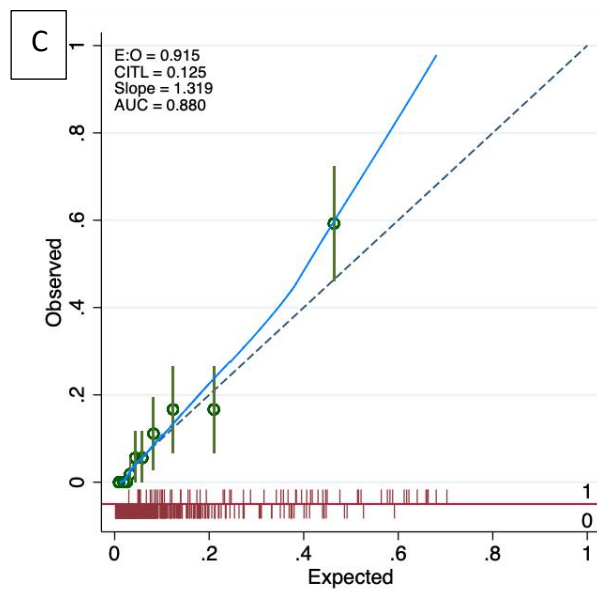

The overall results of the 3 model are comparable, both in overall significance and in with the model included in the manuscript using a 75% increase as a percentage cut-off presenting a slightly superior discrimination.
